# Supplementary material
Source: MDPI journal article supplement (https://www.mdpi.com/2571-8800/6/1/9)
Supplement: s1 [file s1]

# Ethnobotanical Study of Traditional Medicinal Plants used for the treatment of Infectious Diseases by Local Communities in Traditional Authority (T/A) Mbelwa, Mzimba District, Northern Region, Malawi

Wilfred A. Chisamile <sup>1,2 \*</sup>, Mubo A. Sonibare <sup>1</sup> and John F. Kamanula <sup>3</sup>

<sup>1</sup> Faculty of Agriculture, Basic Sciences Department, Lilongwe University of Agriculture and Natural Resources (LUANAR), P.O Box 219, Lilongwe, Malawi  
<sup>2</sup> Faculty of Pharmacy, Department of Pharmacognosy, Pan African University of Life and Earth Sciences (Including Health and Agriculture), University of Ibadan, Ibadan 200005, Nigeria  
<sup>3</sup> Faculty of Science, Technology, and Innovations, Department of Chemistry, Mzuzu University, Private Bag 201, Mzuzu, Malawi  
\* Correspondence: wilfredchisamile@gmail.com or wchisamile@luanar.ac.mw; Tel.: +265997499268

Table S1. Ethnomedicinal data of medicinal plants recorded in T/A Mbelwa, Mzimba district (Supplementary file)

| Species Names                             | Family/Voucher specimen/Habit at /Habit/IUCN RedList | Local Names   | Parts Used | Method of Preparation                                                                                                                                                                                                                      | Route of administration | RFC  | UV   | IAR  | RI   | Diseases treated           |
|-------------------------------------------|------------------------------------------------------|---------------|------------|--------------------------------------------------------------------------------------------------------------------------------------------------------------------------------------------------------------------------------------------|-------------------------|------|------|------|------|----------------------------|
| <i>Abelmoschus esculentus</i> (L.) Moench | Malvaceae/WC/MST064/C/H/LC                           | Delele        | Leaves     | Cut, mix with <i>Abelmoschus esculentus</i> , <i>Sesamum angolense</i> , <i>Ziziphus abyssinica</i> , and <i>Ozoroa insignis</i> roots half burn, make incisions on the affected lung area.                                                | Subcutaneous            | 0.05 | 0.03 | 1    | 0.2  | Whooping cough             |
| <i>Acacia amythethophylla</i> A.Rich.     | Leguminosae/WC/MST037/W/T/LC                         | Bunata        | Roots      | Cut, shade/ sundry, pound into powder, soak/boil with <i>Psorospermum febrifugum</i> in water, drink half cup 2-3 times a day.                                                                                                             | Oral                    | 0.2  | 0.08 | 0.86 | 0.61 | Cholera                    |
|                                           |                                                      |               |            | Cut into small pieces, shade dry, grind into powder with mortar and pestle, boil with water for less than 10 min, sieve, and drink the extract/ prepare porridge with the extract, 3 times a day (morning, afternoon, and evening).        | Oral                    |      |      |      |      | Intestinal worms/helminths |
|                                           |                                                      |               |            | Cut, shade/ sundry, pound into powder, mix with <i>Psychotria eminiiana</i> , and <i>Musa × paradisiaca</i> , soak in water and wash on affected area/prepare porridge and add half teaspoon 3 times a day.                                | Oral, topical use       |      |      |      |      | Syphilis                   |
|                                           |                                                      |               |            | Cut, shade/ sundry, pound into powder, mix with <i>Steganotaenia araliacea</i> , <i>Monotes africana</i> , <i>Cassytha filiformis</i> , and <i>Solanum panduriforme</i> , prepare porridge/ wash affected area.                            | Oral, topical use       |      |      |      |      | Chancroid                  |
|                                           |                                                      |               |            | Cut, shade dry, pound into powder, soak/boil with <i>Zanthoxylum chalybeum</i> in water, drink half -one cup a day with milk/ 1-2 teaspoon of honey.                                                                                       | Oral                    |      |      |      |      | Ulcers                     |
| <i>Albizia antunesiana</i> Harms          | Leguminosae/WC/MST038/W/T/LC                         | Chitong ololo | Roots      | Cut, shade/ sundry, pound into powder, mix with <i>Euphorbia griseola</i> , <i>Albizia antunesiana</i> , and <i>Pterocarpus angolensis</i> , soak in water and wash on affected area/prepare porridge and add half teaspoon 3 times a day. | Oral                    | 0.05 | 0.05 | 0    | 0.39 | Gonorrhea                  |
|                                           |                                                      |               |            | Cut, shade/sundry, pound into powder, mix with <i>Mucuna stans</i> , <i>Euphorbia griseola</i> , <i>Droogmansia pteropus</i> , and <i>Memecylon flavovirens</i> prepare porridge add half or 1 teaspoon, 2-3 times a day.                  | Oral                    |      |      |      |      | Tuberculosis               |

|                                    |                                   |               |              |                                                                                                                                                                                                                                                                                                                         |                             |      |      |      |      |                                  |
|------------------------------------|-----------------------------------|---------------|--------------|-------------------------------------------------------------------------------------------------------------------------------------------------------------------------------------------------------------------------------------------------------------------------------------------------------------------------|-----------------------------|------|------|------|------|----------------------------------|
| <i>Allium sativum</i> L.           | Amaryllidaceae/WC/MST073/C/H/LC   | Adyo          | Bulbs        | Mix <i>Zingiber officinale</i> , <i>Azadirachta indica</i> , and <i>Ziziphus abyssinica</i> , boil for 10-15 min, then steam by covering oneself with a blanket for 5-10 min, 2-3 times a day.                                                                                                                          | Inhalation, oral            | 0.5  | 0.08 | 0.95 | 0.46 | Covid 19                         |
|                                    |                                   |               |              | Cut, sun/shade dry, grind into powder, mix with <i>Zingiber officinale</i> , put 1-2 teaspoons into porridge, 2 times a day.                                                                                                                                                                                            | Oral                        |      |      |      |      | Diarrhoea                        |
|                                    |                                   |               |              | Mix <i>Zingiber officinale</i> , <i>Azadirachta indica</i> , and <i>Phaseolus vulgaris</i> with <i>Mylabis sp</i> (insect), and monkey bones, pulverize into powder, boil for 10-15 min, take it orally one cup full, 2-3 times a day).                                                                                 | Oral                        |      |      |      |      | HIV/AIDS                         |
| <i>Aloe christiani</i> Reynolds    | Xanthorrhoeaceae/WC/MST013/M/S/LC | Chinthe mbwe  | Leaf sap     | Cut, squeeze out the sap/section into small pieces, soak in water and administer 2-3 times a day.                                                                                                                                                                                                                       | Oral, topical use           | 0.45 | 0.2  | 0.82 | 1.07 | Malaria, Ulcers                  |
|                                    |                                   |               |              | Cut into small pieces, shade dry, grind into powder with mortar and pestle, boil with water for less than 10 min, sieve, and drink the extract/ prepare porridge with the extract, 3 times a day (morning, afternoon, and evening).                                                                                     | Oral                        |      |      |      |      | Intestinal worms/helminths       |
|                                    |                                   |               |              | Cut, squeeze out the sap, mix with water and wash the affected part 2-3 times a day.                                                                                                                                                                                                                                    | Topical use                 |      |      |      |      | Syphilis, Candidiasis, Chancroid |
|                                    |                                   |               |              | Cut, squeeze out the sap, mix with water and wash the affected part 2-3 times a day.                                                                                                                                                                                                                                    | Topical use                 |      |      |      |      | Ringworms, Athlete's foot        |
| <i>Annona senegalensis</i> Pers    | Annonaceae/WC/MST028/M/SS/LC      | Mpoza         | Roots, Stems | Cut, sun/shade dry, grind into powder, put 1-2 teaspoons into porridge, 2 times a day.                                                                                                                                                                                                                                  | Oral                        | 0.18 | 0.13 | 0.5  | 0.86 | Cholera                          |
|                                    |                                   |               |              | Cut, sun/shade dry, grind into powder, mix with and <i>Mangifera indica</i> , put 1-2 teaspoons into porridge, 2 times a day.                                                                                                                                                                                           | Oral                        |      |      |      |      | Dysentery, Diarrhoea             |
|                                    |                                   |               |              | Cut, shade/ sundry, pound into powder, mix with <i>Mangifera indica</i> and <i>Zanha africana</i> , prepare porridge/ wash affected area.                                                                                                                                                                               | Oral, genital wash          |      |      |      |      | Chancroid                        |
|                                    |                                   |               |              | Sun/shade dry, grind into powder, mix with <i>Tephrosia vogelli</i> , <i>Annona senegalensis</i> , and vaseline or cooking oil, apply on the affected area, 2-3 times a day.                                                                                                                                            | Otic/ topical use           |      |      |      |      | Skin abscess                     |
| <i>Arachis hypogaea</i> L.         | Leguminosae/WC/MST080/C/H/LC      | Skawa         | Seeds        | Cut, shade/ sundry, pound into powder, mix with <i>Capsicum annuum</i> , <i>Asparagus buechananii</i> , <i>Phaseolus vulgaris</i> , and <i>Pseudolachnostylis maprouneifolia</i> , prepare porridge/ mix the powdered material with an antelope's skin, snail's shell and vegetable oil and apply on the affected area. | Topical                     | 0.05 | 0.03 | 1    | 0.2  | Athlete's foot                   |
| <i>Asparagus buechananii</i> Baker | Asparagaceae/WC/MST040/W/S/LC     | Mkolan khanga | Roots        | Cut, shade/ sun dry, pound into powder, mix with <i>Musa</i> × <i>paradisiaca</i> , and <i>Acacia amythethophylla</i> , soak in water and wash on affected area/prepare porridge and add half teaspoon 3 times a day.                                                                                                   | Oral, topical/ genital wash | 0.13 | 0.08 | 0.5  | 0.59 | Syphilis                         |

|                                                          |                              |        |        |                                                                                                                                                                                                                                       |                    |      |      |      |      |                                                           |
|----------------------------------------------------------|------------------------------|--------|--------|---------------------------------------------------------------------------------------------------------------------------------------------------------------------------------------------------------------------------------------|--------------------|------|------|------|------|-----------------------------------------------------------|
|                                                          |                              |        |        | Cut, shade dry, pound into powder, mix with <i>Ziziphus abyssinica</i> , and <i>Erthrophleum suaveolens</i> , soak in water, sieve, and administer with milk/ honey (1-2 teaspoons), drink half cup.                                  | Oral               |      |      |      |      | Intestinal worms/helminths                                |
|                                                          |                              |        |        | Cut into small pieces, shade dry, grind into powder with mortar and pestle, boil with <i>Terminalia sericea</i> for less than 10 min, mix with honey/milk, and drink.                                                                 | Oral               |      |      |      |      | Ulcers                                                    |
| <i>Azadirachta indica</i> A. Juss.                       | Meliaceae/WC/MST078/C/T/LC   | Nimu   | Leaves | Cut, mix <i>Zingiber officinale</i> , <i>Allium sativum</i> , <i>Phaseolus vulgaris</i> with <i>Mylabis</i> spp (insect), and monkey bones, pulverize into powder, boil for 10-15 min, take it orally one cup full, 2-3 times a day). | Oral               | 0.15 | 0.08 | 0.08 | 0.46 | HIV/AIDS                                                  |
|                                                          |                              |        |        | Cut, mix <i>Zingiber officinale</i> , <i>Allium sativum</i> , and <i>Ziziphus abyssinica</i> boil for 10-15 min, then steaming by covering oneself with a blanket for 5-10 min, 2-3 times a day.                                      | Inhalation, oral   |      |      |      |      | Covid 19                                                  |
|                                                          |                              |        |        | Cut, shade dry, pound into powder, soak/boil in water, drink half -one cup a day with milk/ 1-2 teaspoon of honey.                                                                                                                    | Oral               |      |      |      |      | Malaria                                                   |
| <i>Azanza garckeana</i> (F.Hoffm) Exell & Hillc.         | Malvaceae/WC/MST069/M/T/LC   | Matowa | Leaves | Cut, shade/sundry, pound into powder, mix with <i>Trichodesma zeylanicum</i> soak in water and wash eyes.                                                                                                                             | Ocular             | 0.18 | 0.08 | 0.83 | 0.46 | Conjunctivitis                                            |
|                                                          |                              |        |        | Cut, mix with <i>Asparagus buechananii</i> , <i>Bauhinia thonningii</i> , and <i>Lannea discolor</i> roots, boil/steam, and cover with a blanket, 2-3 times a day.                                                                    | Oral               |      |      |      |      | Common cold                                               |
|                                                          |                              |        |        | Mix <i>Azanza garckeana</i> , <i>Combretum zeyheri</i> , and <i>Ziziphus abyssinica</i> , cut, sundry, pound into powder, prepare porridge to add half to 1 teaspoon.                                                                 | Oral               |      |      |      |      | Tuberculosis                                              |
| <i>Baccharoides adoensis</i> (Sch. Bip. ex Walp.) H.Rob. | Leguminosae/WC/MST014/W/T/LC | Chiso  | Roots  | Cut, shade dry, pound into powder, soak in water, mix with milk/ honey (1-2 teaspoons), drink half cup.                                                                                                                               | Oral               | 0.63 | 0.2  | 0.83 | 1.2  | Dysentery, Diarrhoea, Intestinal worms/helminths, Malaria |
|                                                          |                              |        |        | Cut, mix with <i>Solanum panduriforme</i> and <i>Baccharoides adoensis</i> roots half burn, make incisions on the affected lung area.                                                                                                 | Oral, subcutaneous |      |      |      |      | Pneumonia                                                 |
|                                                          |                              |        |        | Cut, shade dry, pound into powder, mix with <i>Gardenia ternifolia</i> , <i>Cassia abbreviata</i> , and <i>Baccharoides adoensis</i> , prepare porridge/ apply powder on the affected area.                                           | Oral, topical use  |      |      |      |      | Chancroid                                                 |
|                                                          |                              |        |        | Cut, shade dry, pound into powder, mix with <i>Cassia abbreviata</i> , and <i>Oldfieldia dactylophylla</i> prepare porridge/ apply powder on the affected area.                                                                       | Oral, topical use  |      |      |      |      | Gonorrhoea                                                |
|                                                          |                              |        |        | Cut, shade dry, pound into powder, soak in water, drink half cup/ mix powder with <i>Zanha africana</i> , <i>Cassia abbreviata</i> , <i>Oldfieldia dactylophylla</i> , and vaseline, apply on the affected part 2 times a day.        | Oral, topical use  |      |      |      |      | Shingles                                                  |
| <i>Bauhinia thonningii</i> Schum                         | Leguminosae/WC/MST025/W/T/DD | Museke | Leaves | Fresh/dried plant material is boiled, cooled, and sieved, extract is used to prepare porridge -3 times a day (morning, afternoon, and evening).                                                                                       | Oral               | 0.15 | 0.13 | 0.6  | 0.73 | River blindness                                           |

|                                         |                                      |                |       |                                                                                                                                                                                                                                                                                                                             |                             |      |      |     |      |                            |
|-----------------------------------------|--------------------------------------|----------------|-------|-----------------------------------------------------------------------------------------------------------------------------------------------------------------------------------------------------------------------------------------------------------------------------------------------------------------------------|-----------------------------|------|------|-----|------|----------------------------|
|                                         |                                      |                |       | Cut, sun/shade dry, grind into powder, mix with <i>Cissus grisea</i> , put 1-2 teaspoons into porridge, 2 times a day.                                                                                                                                                                                                      | Oral                        |      |      |     |      | Diarrhoea                  |
|                                         |                                      |                |       | Cut, shade dry, pound into powder, mix with <i>Steganotaenia araliacea</i> , and <i>Cassipourea malosana</i> soak in water, sieve, and administer with milk/ honey (1-2 teaspoons), drink half cup.                                                                                                                         | Oral                        |      |      |     |      | Intestinal worms/helminths |
|                                         |                                      |                |       | Cut, mix with <i>Asparagus buchananii</i> , <i>Lannea discolor</i> , and <i>Azanza garckeana</i> roots, boil/steam, and cover with a blanket, 2-3 times a day.                                                                                                                                                              | Inhalation, oral            |      |      |     |      | Common cold                |
|                                         |                                      |                |       | Clean with water, section into small pieces, shade dry, grind into powder with mortar and pestle, mix with <i>Senna singueana</i> , cold macerate, administer orally or mix with porridge, 3 times a day.                                                                                                                   | Oral                        |      |      |     |      | Malaria                    |
| <i>Blepharis grandis</i><br>C.B. Clarke | Acanthaceae/WC<br>/MST047/W/H/L<br>C | Jolojont<br>hi | Roots | Cut, shade/ sundry, pound into powder, soak/boil with <i>Asparagus buchananii</i> in water, drink a half cup a day/ apply the mixed powder on the affected area.                                                                                                                                                            | Topical/ oral               | 0.08 | 0.05 | 0.5 | 0.39 | Shingles                   |
|                                         |                                      |                |       | Cut into small pieces, shade dry, grind into powder with mortar and pestle, boil with <i>Cassia abbreviata</i> , and <i>Asparagus buchananii</i> , for less than 10 min, mix with honey/milk and drink.                                                                                                                     | Oral                        |      |      |     |      | Ulcers                     |
| <i>Boscia angustifolia</i><br>A.Rich    | Capparaceae/W<br>C/MST042/W/T/<br>LC | Mpotol<br>o    | Roots | Cut, mix with <i>Ziziphus abyssinica</i> , <i>Ficus sycamorus</i> , <i>Mucuna stans</i> , <i>Lannea discolor</i> , and <i>Pericopsis angolensis</i> dried powdered material with water, simmer with lukewarm water and press on the affected limbs.                                                                         | Oral                        | 0.08 | 0.08 | 0   | 0.59 | Polio                      |
|                                         |                                      |                |       | Cut, shade/ sundry, pound into powder, mix with <i>Leptactina benguelensis</i> , <i>Uapaca kirkiana</i> , and <i>Carica papaya</i> soak in water and wash on affected area.                                                                                                                                                 | Oral, topical/ genital wash |      |      |     |      | Candidiasis                |
|                                         |                                      |                |       | Mix <i>Erthrophleum suaveolens</i> , <i>Reissantia indica</i> , and <i>Securidaca longipedunculata</i> , cut, sundry, pound into powder, prepare porridge to add half to 1 teaspoon.                                                                                                                                        | Oral                        |      |      |     |      | Tuberculosis               |
| <i>Capsicum annuum</i> L.               | Solanaceae/WC/<br>MST066/C/H/LC      | Tsabola        | Roots | Mix <i>Flueggea virosa</i> , <i>Capsicum annuum</i> , <i>Musa × paradisiaca</i> , and <i>Euphorbia griseola</i> crush the plant material, add some water, obtain the filtrate and rub on the lungs area.                                                                                                                    | Topical                     | 0.15 | 0.1  | 0.4 | 0.79 | Pneumonia                  |
|                                         |                                      |                |       | Cut, shade/ sun dry, pound into powder, soak/boil with <i>Senna singueana</i> , and <i>Carica papaya</i> in water, drink half -one cup a day.                                                                                                                                                                               | Oral                        |      |      |     |      | Cholera                    |
|                                         |                                      |                |       | Sun/shade dry, grind into powder, mix <i>Ozoroa insignis</i> , <i>Parinari curatellifolia</i> with vaseline or cooking oil, apply on the affected area, 2-3 times a day.                                                                                                                                                    | Otic/ topical use           |      |      |     |      | Skin abscess               |
|                                         |                                      |                |       | Cut, shade/ sundry, pound into powder, mix with <i>Asparagus buchananii</i> , <i>Phaseolus vulgaris</i> , <i>Arachis hypogaea</i> , and <i>Pseudolachnostylis maprouneifolia</i> , and prepare porridge/ mix the powdered material with an antelope's skin, snail's shell and vegetable oil and apply on the affected area. | Topical                     |      |      |     |      | Athlete's foot             |

|                                           |                                      |              |                             |                                                                                                                                                                                                                                    |                      |      |      |      |      |                                   |
|-------------------------------------------|--------------------------------------|--------------|-----------------------------|------------------------------------------------------------------------------------------------------------------------------------------------------------------------------------------------------------------------------------|----------------------|------|------|------|------|-----------------------------------|
| <i>Carica papaya</i> L.                   | Caricaceae/WC/M<br>ST061/C/T/LC      | Papaya       | Leaves<br>/ fruit/<br>seeds | Fresh/dried plant material is boiled, cooled, and sieved, extract is used to prepare porridge -3 times a day (morning, afternoon, and evening).                                                                                    | Oral                 | 0.53 | 0.13 | 0.9  | 0.73 | Gonorrhea                         |
|                                           |                                      |              |                             | Cut, shade/ sundry, pound into powder, mix with <i>Leptactina benguelensis</i> , <i>Boscia angustifolia</i> , and <i>Uapaca kirkiana</i> , soak in water and wash on the affected area.                                            | Topical              |      |      |      |      | Candidiasis                       |
|                                           |                                      |              |                             | Remove the seeds from unripe/ripe fruit, crush them, mix with <i>Ricinus communis</i> , and <i>Maprounea Africana</i> soak in water, sieve and administer with milk/ honey (1-2 teaspoons), drink half cup.                        | Oral                 |      |      |      |      | Intestinal<br>worms/helminths     |
|                                           |                                      |              |                             | Wash the ripe fruit, peel it off and eat the fruit.                                                                                                                                                                                | Oral                 |      |      |      |      | Covid 19                          |
|                                           |                                      |              |                             | Cut, shade/ sundry, pound into powder, soak/boil with <i>Senna singueana</i> and <i>Capsicum annuum</i> in water, drink half -one cup a day.                                                                                       | Oral                 |      |      |      |      | Cholera                           |
| <i>Cascabela thevetia</i><br>(L.) Lippold | Apocynaceae/W<br>C/MST012/C/T/L<br>C | Heji         | Roots                       | Cut, shade/ sundry, pound into powder, boil with <i>Luffa cylindrica</i> , and <i>Uapaca kirkiana</i> in water, drink half -one cup a day.                                                                                         | Oral                 | 0.05 | 0.05 | 1    | 0.27 | Diarrhoea                         |
|                                           |                                      |              |                             | Cut, sun/shade dry, grind into powder, mix with <i>Monotes africana</i> , <i>Eriosema ellipticum</i> , and <i>Terminalia sericea</i> , prepare porridge and add half-1 teaspoon 2-3 times a day.                                   | Oral                 |      |      |      |      | Dysentery                         |
| <i>Cassia abbreviata</i><br>Oliv.         | Leguminosae/W<br>C/MST060/W/T/<br>LC | Muwa<br>wani | Roots                       | Cut, shade dry, pound into powder, soak/boil with <i>Zanthoxylum chalybeum</i> , and <i>Oldfieldia dactylophylla</i> in water, mix with milk/ honey, drink half cup.                                                               | Oral, topical<br>use | 0.68 | 0.35 | 0.88 | 1.5  | Malaria                           |
|                                           |                                      |              |                             | Clean with water, sun/shade dry, pound into powder, mix with <i>Oldfieldia dactylophylla</i> and <i>Hypoxis nyasica</i> , soak in water, mix with milk/ honey (1-2 teaspoons), drink half cup.                                     | Oral                 |      |      |      |      | Urinary Tract<br>Infection        |
|                                           |                                      |              |                             | Mix fresh/dried plant material with <i>Rumex usambarensis</i> , soak in water, sieve, and drink half cup 2-3 times a day.                                                                                                          | Oral                 |      |      |      |      | Meningitis                        |
|                                           |                                      |              |                             | Cut, shade dry, pound into powder, soak in water, mix with milk/ honey (1-2 teaspoons), drink half cup.                                                                                                                            | Oral                 |      |      |      |      | Dysentery                         |
|                                           |                                      |              |                             | Cut, shade dry, pound into powder, soak in water, drink half cup/ mix powder with <i>Zanha africana</i> , <i>Baccharoides adoensis</i> , <i>Oldfieldia dactylophylla</i> , and vaseline, apply on the affected part 2 times a day. | Oral, topical<br>use |      |      |      |      | Shingles                          |
|                                           |                                      |              |                             | Cut into small pieces, shade dry, grind into powder with mortar and pestle, boil with <i>Blepharis grandis</i> , and <i>Asparagus buechananii</i> for less than 10 min, mix with honey/milk and drink.                             | Oral                 |      |      |      |      | Ulcers                            |
|                                           |                                      |              |                             | Cut, shade dry, pound into powder, mix with <i>Gardenia ternifolia</i> , <i>Baccharoides adoensis</i> , prepare porridge/ apply powder on the affected area.                                                                       | Oral, topical<br>use |      |      |      |      | Chancroid                         |
|                                           |                                      |              |                             | Cut, shade dry, pound into powder, mix with porridge/ apply the powder to the affected area.                                                                                                                                       | Oral, topical<br>use |      |      |      |      | Syphilis, Gonorrhea,<br>Bilharzia |

|                                               |                                 |                |             |                                                                                                                                                                                                                                       |                             |      |      |      |      |                            |
|-----------------------------------------------|---------------------------------|----------------|-------------|---------------------------------------------------------------------------------------------------------------------------------------------------------------------------------------------------------------------------------------|-----------------------------|------|------|------|------|----------------------------|
|                                               |                                 |                |             | Cut, shade dry, pound into powder, mix with <i>Cissus grisea</i> , prepare porridge, make incisions on the affected area.                                                                                                             | Oral, subcutaneous          |      |      |      |      | Elephantiasis              |
|                                               |                                 |                |             | Cut, shade dry, pound into powder, mix with porridge/ make markings on the affected lung area.                                                                                                                                        | Oral, subcutaneous          |      |      |      |      | Tuberculosis, Common cold  |
| <i>Cassipourea malosana</i> (Baker) Alston    | Rhizophoraceae/WC/MST026/W/S/LC | Mkand anjovu   | Roots       | Cut, shade dry, pound into powder, mix with <i>Steganotaenia araliacea</i> , and <i>Bauhinia thonningii</i> soak in water, sieve and administer with milk/ honey (1-2 teaspoons), drink half cup.                                     | Oral                        | 0.05 | 0.03 | 1    | 0.2  | Intestinal worms/helminths |
| <i>Cassytha filiformis</i> L.                 | Leguminosae/WC/MST054/W/T/LC    | Sakadzi nje    | Leaves      | Cut, shade/ sundry, pound into powder, mix with <i>Steganotaenia araliacea</i> and <i>Senna spectabilis</i> , soak in water and wash on affected area/ with a smooth stone, boil in water and massage the affected area.              | Oral                        | 0.05 | 0.05 | 1    | 0.27 | Cholera                    |
|                                               |                                 |                |             | Cut, shade/ sundry, pound into powder, mix with <i>Steganotaenia araliacea</i> , <i>Acacia amythethophylla</i> , <i>Cassytha filiformis</i> , and <i>Solanum panduriforme</i> , prepare porridge/ wash affected area.                 | Oral, topical               |      |      |      |      | Chancroid                  |
| <i>Catunaregam spinosa</i> (Thunb.) Tirveng.  | Rubiaceae/WC/MST003/W/S/LC      | Chipem bere    | Stem, Roots | Clean with water, section into small pieces, shade dry, grind into powder with mortar and pestle, mix with <i>Flueggea virosa</i> , cold macerate, administer orally or mix with porridge, 3 times a day.                             | Oral                        | 0.05 | 0.03 | 1    | 0.2  | Malaria                    |
| <i>Cissus grisea</i> (Baker)                  | Vitaceae/WC/MS T071/W/V/LC      | Mphesya        | Whole Plant | Cut, shade dry, pound into powder, mix with <i>Cassia abbreviata</i> , prepare porridge, make incisions on the affected area.                                                                                                         | Oral, subcutaneous          | 0.08 | 0.1  | 0    | 0.66 | Elephantiasis              |
|                                               |                                 |                |             | Cut, sun/shade dry, grind into powder, mix with <i>Psidium guajava</i> , and <i>Mangifera indica</i> , put 1-2 teaspoons into porridge, 2 times a day.                                                                                | Oral                        |      |      |      |      | Dysentery                  |
|                                               |                                 |                |             | Cut, sun/shade dry, grind into powder, mix with <i>Bauhinia thonningii</i> , put 1-2 teaspoons into porridge, 2 times a day                                                                                                           | Oral                        |      |      |      |      | Diarrhoea                  |
|                                               |                                 |                |             | Cut, shade/sundry, pound into powder, mix with <i>Ozoroa insignis</i> , prepare porridge/ half burn the root, and make incisions on the affected lung area.                                                                           | Oral, subcutaneous          |      |      |      |      | Tuberculosis               |
| <i>Combretum zeyheri</i> Sond.                | Combretaceae/WC/MST043/W/T/LC   | Mlama/ mpond o | Root Bark   | Mix <i>Azanza garckeana</i> , <i>Combretum zeyheri</i> , and <i>Ziziphus abyssinica</i> , cut, sundry, pound into powder, prepare porridge and add half to 1 teaspoon.                                                                | Oral                        | 0.05 | 0.05 | 0    | 0.39 | Tuberculosis               |
|                                               |                                 |                |             | Cut, shade/ sundry, pound into powder, mix with <i>Psorospermum febrifugum</i> , and <i>Monotes africana</i> , soak in water and wash on affected area/prepare porridge and add half teaspoon 3 times a day.                          | Oral, topical/ genital wash |      |      |      |      | Syphilis                   |
| <i>Datura stramonium</i> L                    | Solanaceae/WC/MST019/W/T/NE     | Chengamono     | Roots       | Cut, shade dry, pound into powder, mix with <i>Cassia abbreviata</i> , and <i>Oldfieldia dactylophylla</i> , prepare porridge half teaspoon, 2 times a day/ apply powder on the affected area.                                        | Topical use                 | 0.05 | 0.03 | 1    | 0.2  | Syphilis                   |
| <i>Dichrostachys cinerea</i> (L.) Wight & Arn | Leguminosae/WC/MST010/W/T/LC    | Mphan gala     | Roots       | Mix <i>Pterocarpus angolensis</i> , <i>Trichodesma zeylanicum</i> , and <i>Dichrostachys cinerea</i> , clean the roots, burn incompletely/charr, crush into powder, sieve and add body lotion/oil e.g., vaseline, apply on the body). | Topical                     | 0.18 | 0.1  | 0.67 | 0.66 | Scabies                    |

|                                                        |                                   |               |             |                                                                                                                                                                                                                               |                  |      |      |      |      |                            |
|--------------------------------------------------------|-----------------------------------|---------------|-------------|-------------------------------------------------------------------------------------------------------------------------------------------------------------------------------------------------------------------------------|------------------|------|------|------|------|----------------------------|
|                                                        |                                   |               |             | Cut, mix with <i>Mucuna stans</i> , <i>Asparagus buehnananii</i> , and <i>Pericopsis angolensis</i> roots half burn, make incisions on the affected lung area.                                                                | Subcutaneous     |      |      |      |      | Whooping cough             |
|                                                        |                                   |               |             | Mix <i>Dichrostachys cinerea</i> , <i>Securidaca longipendunculata</i> , and <i>Asparagus buehnananii</i> , crush the plant material, add some water, obtain the filtrate and rub on the lungs area.                          | Topical          |      |      |      |      | Pneumonia                  |
|                                                        |                                   |               |             | Cut into small pieces, shade dry, grind into powder with mortar and pestle, boil with <i>Ziziphus abyssinica</i> for less than 10 min, mix with honey/milk, and drink.                                                        | Oral             |      |      |      |      | Ulcers                     |
| <i>Droogmansia pteropus</i> (Baker) De Wild.           | Leguminosae/WC/MST053/W/H/LC      | Mulung alunga | Root Bark   | Cut, shade/sundry, pound into powder, mix with <i>Mucuna stans</i> , <i>Euphorbia griseola</i> , <i>Memecylon flavovirens</i> , and <i>Albizia antunesiana</i> , prepare porridge to add half or 1 teaspoon, 2-3 times a day. | Oral             | 0.08 | 0.05 | 0.5  | 0.39 | Tuberculosis, Cholera      |
|                                                        |                                   |               |             | Cut, shade/ sundry, pound into powder, soak/boil with <i>Sesamum angolense</i> , and <i>Securidaca longipedunculata</i> in water, drink half cup 2-3 times a day.                                                             | Oral             |      |      |      |      | Cholera                    |
| <i>Eragrostis patens</i> Oliv.                         | Poaceae/WC/MS T006/W/G/LC         | Zukwe         | Whole Plant | Cut, shade/ sundry, pound into powder, soak/boil with <i>Uapaca kirkiana</i> , <i>Gardenia ternifolia</i> , and <i>Morus alba</i> in water, drink a half cup a day.                                                           | Oral             | 0.05 | 0.05 | 0    | 0.39 | Bilharzia                  |
|                                                        |                                   |               |             | Cut, shade/ sundry, pound into powder, mix with <i>Senna singueana</i> , <i>Reissantia indica</i> , and <i>Musa × paradisiaca</i> , soak in water, and wash/massage on the affected area.                                     | Topical          |      |      |      |      | Chancroid                  |
| <i>Eriosema ellipticum</i> Baker                       | Dipterocarpaceae/WC/MST039/W/T/DD | Mukala kati   | Root Bark   | Cut, sun/shade dry, grind into powder, mix with <i>Monotes africana</i> , <i>Terminalia sericea</i> , and <i>Cascabela thevetia</i> , prepare porridge and add half-1 teaspoon 2-3 times a day.                               | Oral             | 0.05 | 0.03 | 1    | 0.2  | Dysentery                  |
| <i>Erthrophleum suaveolens</i> (Guill. & Perr.) Brenan | Leguminosae/WC/MST076/M/T/LC      | Mwavi         | Roots       | Cut, shade/ sun dry, pound into powder, prepare porridge 2-3 times a day.                                                                                                                                                     | Oral use         | 0.1  | 0.1  | 0.33 | 0.66 | Strept throat              |
|                                                        |                                   |               |             | Mix <i>Boscia angustifolia</i> , <i>Reissantia indica</i> , and <i>Securidaca longipedunculata</i> , cut, sundry, pound into powder, prepare porridge and add half to 1 teaspoon of plant material.                           | Oral             |      |      |      |      | Tuberculosis               |
|                                                        |                                   |               |             | Cut, shade dry, pound into powder, mix with <i>Zanha africana</i> , prepare porridge/ half burn the root, and make incisions on the affected area.                                                                            | Topical          |      |      |      |      | Polio                      |
|                                                        |                                   |               |             | Cut, shade dry, pound into powder, mix with <i>Ziziphus abyssinica</i> , and <i>Psychotria eminiiana</i> , soak in water, sieve, and administer with milk/ honey (1-2 teaspoons), drink half cup.                             | Oral             |      |      |      |      | Intestinal worms/helminths |
| <i>Eucalyptus camaldulensis</i> Dehnh.                 | Myrtaceae/WC/MST056/C/T/NT        | Buluga mu     | Leaves      | Cut, mix, with fresh <i>Zanha africana</i> , boil and steam 2-3 times a day                                                                                                                                                   | Inhalation/ oral | 0.63 | 0.08 | 0.96 | 0.46 | Covid 19                   |

|                                                |                                 |            |             |                                                                                                                                                                                                                                                         |                             |      |      |      |      |  |              |
|------------------------------------------------|---------------------------------|------------|-------------|---------------------------------------------------------------------------------------------------------------------------------------------------------------------------------------------------------------------------------------------------------|-----------------------------|------|------|------|------|--|--------------|
|                                                |                                 |            |             | Cut, shade/sundry, pound into powder, mix <i>Ozoroa insignis</i> , prepare porridge/ half burn the root, and make incisions on the affected lung area.                                                                                                  | Oral, subcutaneous          |      |      |      |      |  | Tuberculosis |
|                                                |                                 |            |             | Cut, sun/shade dry, grind into powder, mix with <i>Annona senegalensis</i> , put 1-2 teaspoons into porridge, 2 times a day.                                                                                                                            | Oral                        |      |      |      |      |  | Diarrhoea    |
| <i>Euphorbia griseola</i> Pax                  | Euphorbiaceae/WC/MST052/W/S/LC  | Mlangari   | Whole Plant | Mix <i>Flueggea virosa</i> , <i>Capsicum annuum</i> , <i>Musa × paradisiaca</i> , and <i>Euphorbia griseola</i> crush the plant material, add some water, obtain the filtrate and rub on the lungs area.                                                | Topical                     | 0.05 | 0.08 | 0    | 0.46 |  | Pneumonia    |
|                                                |                                 |            |             | Cut, shade/sundry, pound into powder, mix with <i>Mucuna stans</i> , <i>Droogmansia pteropus</i> , <i>Memecylon flavovirens</i> , and <i>Albizia antunesiana</i> , prepare porridge, and add half or 1 teaspoon, 2-3 times a day.                       | Oral                        |      |      |      |      |  | Tuberculosis |
|                                                |                                 |            |             | Cut, shade/ sundry, pound into powder, mix with <i>Albizia antunesiana</i> , and <i>Pterocarpus angolensis</i> , soak in water and wash on affected area/prepare porridge and add half teaspoon 3 times a day.                                          | Oral, topical/ genital wash |      |      |      |      |  | Gonorrhoea   |
| <i>Ficus sycamorus</i> L                       | Moraceae/WC/MST077/W/T/LC       | Mkuyu      | Roots       | Clean with water, section into small pieces, shade dry, grind into powder with mortar and pestle, mix with <i>Rumex usambarensis</i> , and <i>Grewia damine</i> , cold maceration, administer orally or mix with porridge, 3 times a day.               | Oral                        | 0.08 | 0.05 | 0.5  | 0.39 |  | Malaria      |
|                                                |                                 |            |             | Cut, mix with <i>Ziziphus abyssinica</i> , <i>Boscia angustifolia</i> , <i>Mucuna stans</i> , <i>Lannea discolor</i> , and <i>Pericopsis angolensis</i> dried powdered material with water, simmer with lukewarm water and press on the affected limbs. | Topical                     |      |      |      |      |  | Polio        |
| <i>Ficus natalensis</i> Hochst.                | Moraceae/WC/MST031/W/T/LC       | Kacher     | Roots       | Cut, shade/ sundry, pound into powder, mix with <i>Lannea discolor</i> , and <i>Gardenia ternifolia</i> , soak in water and wash on affected area/ prepare porridge and mix half teaspoon 2-3 times a day.                                              | Topical                     | 0.05 | 0.05 | 0    | 0.39 |  | Gonorrhea    |
|                                                |                                 |            |             | Mix <i>Ricinus communis</i> , <i>Securidaca longipedunculata</i> , and <i>Uapaca sansibarica</i> , clean the roots, burn incompletely/charr, crush into powder, sieve and add body lotion/oil e.g. vaseline, apply on the body.                         | Topical                     |      |      |      |      |  | Scabies      |
| <i>Flueggea virosa</i> (Roxb. ex Willd.) Royle | Phyllanthaceae/WC/MST033/W/S/LC | Kapilapila | Roots       | Cut, shade/ sundry, pound into powder, soak/boil with <i>Parinari curatellifolia</i> , <i>Syzygium cordatum</i> , and <i>Asparagus buehneri</i> in water, drink a half cup a day.                                                                       | Oral                        | 0.15 | 0.05 | 0.6  | 0.52 |  | Bilharzia    |
|                                                |                                 |            |             | Clean with water, section into small pieces, shade dry, grind into powder with mortar and pestle, mix with <i>Flueggea virosa</i> , cold macerate, administer orally or mix with porridge, 3 times a day.                                               | Oral                        |      |      |      |      |  | Malaria      |
| <i>Gardenia ternifolia</i> Schumach. & Thonn   | Rubiaceae/WC/MST005/W/S/LC      | Muvala     | Roots       | Cut, shade/ sundry, pound into powder, mix with <i>Ficus natalensis</i> , and <i>Lannea discolor</i> , soak in water and wash on affected area/ prepare porridge and mix half teaspoon 2-3 times a day.                                                 | Oral                        | 0.1  | 0.08 | 0.67 | 0.46 |  | Gonorrhea    |



|                                                 |                                        |                 |        |                                                                                                                                                                                                                                                           |                                |      |      |      |      |  |                                                                                     |
|-------------------------------------------------|----------------------------------------|-----------------|--------|-----------------------------------------------------------------------------------------------------------------------------------------------------------------------------------------------------------------------------------------------------------|--------------------------------|------|------|------|------|--|-------------------------------------------------------------------------------------|
|                                                 |                                        |                 |        | Cut, shade dry, pound into powder, mix with <i>Cassia abbreviata</i> and <i>Baccharoides adoensis</i> , prepare porridge/ apply powder on the affected area.                                                                                              | Topical/genital use            |      |      |      |      |  | Chancroid                                                                           |
|                                                 |                                        |                 |        | Cut, shade/ sundry, pound into powder, soak/boil with <i>Eragrostis patens</i> , <i>Uapaca kirkiana</i> , and <i>Morus alba</i> in water, drink a half cup a day.                                                                                         | Oral                           |      |      |      |      |  | Bilharzia                                                                           |
| <i>Grewia damine</i><br>Gaertn                  | Malvaceae/WC/<br>MST001/W/S/NE         | Musipa<br>ni    | Roots  | Clean, mix with <i>Zea mays</i> . tassels, the half burn of a fire source, crush into powder, make minor incisions on the affected area.                                                                                                                  | Oral                           | 0.08 | 0.08 | 0    | 0.59 |  | Whooping cough                                                                      |
|                                                 |                                        |                 |        | Cut, shade/sundry, pound into powder, mix with <i>Gymnosporia senegalensis</i> , and <i>Leptactina benguelensis</i> , mix with vaseline and apply on the affected part.                                                                                   | Topical                        |      |      |      |      |  | Chickenpox                                                                          |
|                                                 |                                        |                 |        | Clean with water, section into small pieces, shade dry, grind into powder with mortar and pestle, mix with <i>Rumex usambarensis</i> , and <i>Ficus sycomorus</i> , cold macerate, administer orally or mix with porridge, 3 times a day.                 | Oral                           |      |      |      |      |  | Malaria                                                                             |
| <i>Gymnosporia senegalensis</i><br>(Lam.) Loes. | Celastraceae/WC<br>/MST021/W/T/L<br>C  | Mugub<br>elo    | Roots  | Cut, shade/sundry, pound into powder, mix with <i>Leptactina benguelensis</i> , and <i>Grewia damine</i> , mix with vaseline and apply on the affected part.                                                                                              | Topical                        | 0.08 | 0.05 | 0.5  | 0.39 |  | Chickenpox                                                                          |
|                                                 |                                        |                 |        | Cut, mix with <i>Pseudolachnostylis maprouneifolia</i> boil for 10-15 min, wash eyes/ cover with a blanket for 6-10 min for 3 times a day.                                                                                                                | Ocular                         |      |      |      |      |  | Conjunctivitis                                                                      |
| <i>Hypoxis nyasica</i><br>Baker                 | Hypoxidaceae/W<br>C/MST063/W/H/<br>DD  | Chiswa<br>bumbu | Corms  | Cut, shade/ sundry, pound into powder, soak/boil in water, drink a half cup a day/ prepare with porridge.                                                                                                                                                 | Oral, topical use              | 0.58 | 0.2  | 0.86 | 1.07 |  | Yellow fever                                                                        |
|                                                 |                                        |                 |        | Clean with water, sun/shade dry, pound into powder, mix with <i>Cassia abbreviata</i> , and <i>Oldfieldia dactylophylla</i> , soak in water, mix with milk/ honey (1-2 teaspoons), drink half cup.                                                        | Oral                           |      |      |      |      |  | Urinary Tract Infection                                                             |
|                                                 |                                        |                 |        | Cut, shade/ sundry, pound into powder, prepare porridge/ wash affected area with <i>Aloe christianii</i> and apply powder.                                                                                                                                | Oral, topical use              |      |      |      |      |  | Ringworms,<br>Candidiasis,<br>Chancroid, Syphilis,<br>Athlete's foot,<br>Gonorrhoea |
| <i>Lannea discolor</i><br>(Sond.) Engl.         | Anacardiaceae/<br>WC/MST067/W/<br>T/DD | Kaumb<br>u      | Leaves | Cut, mix with <i>Asparagus buchananii</i> , <i>Bauhinia thonningii</i> , and <i>Azanza garckeana</i> roots, boil/steam and cover with a blanket, 2-3 times a day.                                                                                         | Oral                           | 0.1  | 0.08 | 0.33 | 0.59 |  | Common cold                                                                         |
|                                                 |                                        |                 |        | Cut, mix with <i>Ziziphus abyssinica</i> , <i>Boscia angustifolia</i> , <i>Fiscus sycamorus</i> , <i>Mucuna stans</i> , and <i>Pericopsis angolensis</i> dried powdered material with water, simmer with lukewarm water, and press on the affected limbs. | Topical                        |      |      |      |      |  | Polio                                                                               |
|                                                 |                                        |                 |        | Cut, shade/ sundry, pound into powder, mix with <i>Ficus natalensis</i> , and <i>Gardenia ternifolia</i> , soak in water and wash on affected area/ prepare porridge and mix half teaspoon 2-3 times a day.                                               | Oral,<br>topical/ genital wash |      |      |      |      |  | Gonorrhoea                                                                          |

|                                                          |                                   |                  |             |                                                                                                                                                                                                                              |                             |      |      |      |      |                            |
|----------------------------------------------------------|-----------------------------------|------------------|-------------|------------------------------------------------------------------------------------------------------------------------------------------------------------------------------------------------------------------------------|-----------------------------|------|------|------|------|----------------------------|
| <i>Leptactina benguelensis</i> (Welw. ex Benth. & Hook.f | Rubiaceae/WC/MST051/W/SH/D        | Chiyen damuta la | Whole Plant | Cut, shade/sundry, pound into powder, mix with <i>Gymnosporia senegalensis</i> , and <i>Grewia damine</i> , mix with vaseline and apply on the affected part.                                                                | Oral                        | 0.08 | 0.08 | 0    | 0.59 | Chickenpox                 |
|                                                          |                                   |                  |             | Cut, shade/ sundry, pound into powder, mix with <i>Leptactina benguelensis</i> , <i>Boscia angustifolia</i> , <i>Uapaca kirkiana</i> , and <i>Carica papaya</i> soak in water, and wash on the affected area.                | Topical/ genital wash       |      |      |      |      | Candidiasis                |
| <i>Luffa cylindrica</i> (L.) M.Roem.                     | Cucurbitaceae/WC/MST068/M/H/NE    | Siponji          | Leaves      | Cut, shade/ sundry, pound into powder, boil with <i>Uapaca kirkiana</i> , and <i>Cascabela thevetia</i> in water, drink half -one cup a day.                                                                                 | Oral                        | 0.05 | 0.03 | 1    | 0.2  | Diarrhoea                  |
| <i>Mangifera indica</i> L                                | Anacardiaceae/WC/MST029/C/T/DD    | Mango yadudu     | Stem Bark   | Cut, shade/ sundry, pound into powder, soak/boil with <i>Morus alba</i> in water, drink a half cup a day/ prepare with porridge.                                                                                             | Oral                        | 0.23 | 0.15 | 0.5  | 1.05 | Yellow fever               |
|                                                          |                                   |                  |             | Mix <i>Zanha africana</i> , and <i>Ziziphus abyssinica</i> boil for 10-15 min, then steaming by covering oneself with a blanket for 5-10 min, 2-3 times a day.                                                               | Inhalation, oral            |      |      |      |      | Covid 19                   |
|                                                          |                                   |                  |             | Cut, sun/shade dry, grind into powder, mix with <i>Psidium guajava</i> , and <i>Cissus grisea</i> put 1-2 teaspoons into porridge, 2 times a day.                                                                            | Oral                        |      |      |      |      | Dysentery, diarrhoea       |
|                                                          |                                   |                  |             | Cut, shade/ sundry, pound into powder, mix with <i>Annona senegalensis</i> and <i>Zanha africana</i> , prepare porridge/ wash affected area.                                                                                 | Oral, topical/ genital wash |      |      |      |      | Chancroid                  |
|                                                          |                                   |                  |             | Cut, shade/sundry, pound into powder, soak in water with <i>Asparagus buehneri</i> , and <i>Gymnosporia senegalensis</i> , wash the affected eyes.                                                                           | Ocular                      |      |      |      |      | Conjunctivitis             |
| <i>Maprounea africana</i> Müll.Arg.                      | Euphorbiaceae/WC/MST036/W/T/DD    | Chagaga          | Roots       | Cut, shade dry, pound into powder, mix with <i>Ricinus communis</i> , and <i>Carica papaya</i> soak in water, sieve and administer with milk/ honey (1-2 teaspoons), drink half cup.                                         | Oral                        | 0.08 | 0.05 | 0.5  | 0.39 | Intestinal worms/helminths |
|                                                          |                                   |                  |             | Cut, shade/ sundry, pound into powder, soak/boil with <i>Pseudolachnostylis maprouneifolia</i> and <i>Zanha africana</i> in water, drink a half cup a day.                                                                   | Oral                        |      |      |      |      | Bilharzia                  |
| <i>Memecylon flavovirens</i> Baker                       | Melastomataceae/WC/MST041/W/T/DD  | Kabink hamino    | Roots       | Cut, shade/sundry, pound into powder, mix with <i>Mucuna stans</i> , <i>Euphorbia griseola</i> , <i>Droogmansia pteropus</i> , and <i>Albizia antunesiana</i> , prepare porridge to add half or 1 teaspoon, 2-3 times a day. | Oral                        | 0.05 | 0.03 | 1    | 0.2  | Tuberculosis               |
| <i>Monotes africana</i> A.DC                             | Dipterocarpaceae/WC/MST035/W/T/DD | Mukalakati       | Root Bark   | Cut, shade/ sundry, pound into powder, mix with <i>Psorospermum febrifugum</i> , and <i>Combretum zeyheri</i> , soak in water and wash on affected area/prepare porridge and add half teaspoon 3 times a day.                | Oral, topical/ genital wash | 0.1  | 0.1  | 0.67 | 0.54 | Syphilis                   |
|                                                          |                                   |                  |             | Cut, sun/shade dry, grind into powder, mix with <i>Eriosema ellipticum</i> , <i>Terminalia sericea</i> , and <i>Cascabela thevetia</i> , prepare porridge and add half-1 teaspoon 2-3 times a day.                           | Oral                        |      |      |      |      | Dysentery                  |

|                                                               |                                          |                                   |        |                                                                                                                                                                                                                                                             |                                |      |      |      |      |                         |
|---------------------------------------------------------------|------------------------------------------|-----------------------------------|--------|-------------------------------------------------------------------------------------------------------------------------------------------------------------------------------------------------------------------------------------------------------------|--------------------------------|------|------|------|------|-------------------------|
|                                                               |                                          |                                   |        | Cut, shade/ sundry, pound into powder, mix with <i>Steganotaenia araliacea</i> , <i>Acacia amythethophylla</i> , <i>Cassytha filiformis</i> and <i>Solanum panduriforme</i> , prepare porridge/ wash affected area.                                         | Oral,<br>topical/ genital wash |      |      |      |      | Chancroid               |
|                                                               |                                          |                                   |        | Cut, shade/ sundry, pound into powder, mix with <i>Monotes africana</i> , <i>Senna spectabilis</i> , and <i>Ricinus communis</i> , soak in water and wash on the affected area.                                                                             | Genital wash                   |      |      |      |      | Candidiasis             |
| <i>Morus alba</i> L.                                          | Moraceae/WC/M<br>ST045/C/T/NE            | Makatu<br>kubeni/<br>katuben<br>i | Roots  | Cut, shade/ sundry, pound into powder, soak/boil with <i>Eragrostis patens</i> , <i>Uapaca kirkiana</i> , and <i>Gardenia ternifolia</i> in water, drink a half cup a day.                                                                                  | Oral                           | 0.15 | 0.05 | 0.8  | 0.39 | Bilharzia               |
|                                                               |                                          |                                   |        | Cut, shade/ sundry, pound into powder, soak/boil with <i>Mangifera indica</i> in water, drink a half cup a day/ prepare with porridge.                                                                                                                      | Oral                           |      |      |      |      | Yellow fever            |
| <i>Mucuna stans</i><br>Baker                                  | Leguminosae/W<br>C/MST048/W/V/<br>DD     | Nkhun<br>ga/chite<br>dze          | Roots  | Cut, mix with <i>Ziziphus abyssinica</i> , <i>Boscia angustifolia</i> , <i>Ficus sycamorus</i> , <i>Lannea discolor</i> , and <i>Pericopsis angolensis</i> dried powdered material with water, simmer with lukewarm water, and press on the affected limbs. | Oral                           | 0.08 | 0.08 | 0.5  | 0.46 | Polio                   |
|                                                               |                                          |                                   |        | Cut, shade/sundry, pound into powder, mix with <i>Euphorbia griseola</i> , <i>Droogmansia pteropus</i> , <i>Memecylon flavovirens</i> , and <i>Albizia antunesiana</i> , prepare porridge add half or 1 teaspoon, 2-3 times a day.                          | Oral                           |      |      |      |      | Tuberculosis            |
|                                                               |                                          |                                   |        | Cut, mix with <i>Dichrostachys cinerea</i> , <i>Asparagus buchananii</i> , and <i>Pericopsis angolensis</i> roots half burn, make incisions on the affected lung area.                                                                                      | Subcutaneous                   |      |      |      |      | Whooping cough          |
| <i>Musa × paradisiaca</i> L.                                  | Musaceae/WC/M<br>ST016/C/T/NE            | Nthoch<br>i                       | Leaves | Cut, shade/ sundry, pound into powder, mix with <i>Senna singuena</i> , soak in water and wash on affected area/ prepare porridge and mix half teaspoon 2-3 times a day.                                                                                    | Oral                           | 0.08 | 0.1  | 0.5  | 0.54 | Gonorrhoea              |
|                                                               |                                          |                                   |        | Cut, shade/ sundry, pound into powder, mix with <i>Psychotria eminiana</i> , and <i>Acacia amythethophylla</i> , soak in water and wash on affected area/prepare porridge and add half teaspoon 3 times a day.                                              | Oral,<br>topical/ genital wash |      |      |      |      | Syphilis                |
|                                                               |                                          |                                   |        | Cut, shade/ sundry, pound into powder, mix with <i>Senna singueana</i> , <i>Reissantia Indica</i> and <i>Eragrostis patens</i> , soak in water and wash/massage on the affected area.                                                                       | Topical                        |      |      |      |      | Chancroid               |
|                                                               |                                          |                                   |        | Mix <i>Flueggea virosa</i> , <i>Capsicum annuum</i> , <i>Musa × paradisiaca</i> , and <i>Euphorbia griseola</i> crush the plant material, add some water, obtain the filtrate and rub on the lungs area.                                                    | Topical                        |      |      |      |      | Pneumonia               |
| <i>Oldfieldia dactylophylla</i> (Welw. ex Oliv.)<br>J.Léonard | Picrodendraceae/<br>WC/MST034/W/<br>T/DD | Nawon<br>ga                       | Roots  | Cut, shade dry, pound into powder, soak/boil in water, drink half -one cup a day.                                                                                                                                                                           | Oral                           | 0.58 | 0.23 | 0.83 | 1.27 | Diarrhoea,<br>Dysentery |
|                                                               |                                          |                                   |        | Clean, section into small pieces, soak in water, sieve, and drink the extract.                                                                                                                                                                              | Oral                           |      |      |      |      | Common cold             |

|                                                    |                                           |          |        |                                                                                                                                                                                                                                                   |                    |      |      |      |      |  |                               |
|----------------------------------------------------|-------------------------------------------|----------|--------|---------------------------------------------------------------------------------------------------------------------------------------------------------------------------------------------------------------------------------------------------|--------------------|------|------|------|------|--|-------------------------------|
|                                                    |                                           |          |        | Cut, shade dry, pound into powder, soak/boil with <i>Zanthoxylum chalybeum</i> , and <i>Cassia abbreviata</i> in water, mix with milk/ honey, drink half cup.                                                                                     | Oral               |      |      |      |      |  | Malaria                       |
|                                                    |                                           |          |        | Cut, shade dry, pound into powder, soak in water, drink half cup/ mix powder with <i>Zanha africana</i> , <i>Baccharoides adoensis</i> , <i>Cassia abbreviata</i> , and vaseline, apply on the affected part 2 times a day.                       | Topical            |      |      |      |      |  | Shingles                      |
|                                                    |                                           |          |        | Clean with water, sun/shade dry, pound into powder, mix with <i>Cassia abbreviata</i> and <i>Hypoxis nyasica</i> , soak in water, mix with milk/ honey (1-2 teaspoons), drink half cup.                                                           | Oral               |      |      |      |      |  | Urinary Tract Infection       |
|                                                    |                                           |          |        | Cut, shade dry, pound into powder, mix with porridge/ apply the powder to the affected area.                                                                                                                                                      | Oral               |      |      |      |      |  | Syphilis                      |
|                                                    |                                           |          |        | Cut, shade/ sundry, pound into powder, boil with <i>Zanthoxylum chalybeum</i> in water, drink a half cup a day.                                                                                                                                   | Oral               |      |      |      |      |  | Bilharzia                     |
|                                                    |                                           |          |        | Cut, shade dry, pound into powder, mix with <i>Cassia abbreviata</i> , and <i>Ozoroa insignis</i> prepare porridge/ apply powder on the affected area.                                                                                            | Oral, topical use  |      |      |      |      |  | Gonorrhoea                    |
| <i>Ozoroa insignis</i><br>Delile                   | Anacardiaceae/<br>WC/MST023/W/<br>T/LC    | Chifitye | Roots  | Cut, shade/ sundry, pound into powder, soak/boil with <i>Zanthoxylum chalybeum</i> , <i>Mangifera indica</i> , <i>Oldfieldia dactylophylla</i> , <i>Zanha africana</i> , and <i>Psorospermum febrifugum</i> in water, drink half - one cup a day. | Oral               | 0.65 | 0.23 | 0.79 | 1.39 |  | Cholera, Diarrhoea, Dysentery |
|                                                    |                                           |          |        | Cut, shade/ sundry, pound into powder, soak/boil with <i>Solanum panduriforme</i> , and <i>Pterocarpus angolensis</i> , in water, drink a half cup a day.                                                                                         | Oral               |      |      |      |      |  | Bilharzia                     |
|                                                    |                                           |          |        | Cut, mix with <i>Abelmoschus esculentus</i> , <i>Sesamum angolense</i> , <i>Ziziphus abyssinica</i> , and <i>Ozoroa insignis</i> roots half burn, make incisions on the affected lung area.                                                       | Subcutaneous       |      |      |      |      |  | Whooping cough                |
|                                                    |                                           |          |        | Sun/shade dry, grind into powder, mix <i>Capsicum annuum</i> , and <i>Parinari curatellifolia</i> with vaseline or cooking oil, apply on the affected area, 2-3 times a day.                                                                      | Otic/ topical use  |      |      |      |      |  | Skin abscess                  |
|                                                    |                                           |          |        | Cut, shade/ sundry, pound into powder, mix with porridge/ mix powder with vaseline/ cooking oil, and apply powder on the affected area.                                                                                                           | Oral, topical use  |      |      |      |      |  | Shingles, Scabies             |
|                                                    |                                           |          |        | Cut, shade/sundry, pound into powder, mix <i>Cissus grisea</i> , prepare porridge/ half burn the root, and make incisions on the affected lung area.                                                                                              | Oral, subcutaneous |      |      |      |      |  | Tuberculosis                  |
| <i>Parinari curatellifolia</i><br>Planch. ex Benth | Chrysobalanacea<br>e/WC/MST024/M<br>/T/LC | Mbula    | Leaves | Sun/shade dry, grind into powder, mix <i>Ozoroa insignis</i> , <i>Capsicum annuum</i> with vaseline or cooking oil, apply on the affected area, 2-3 times a day.                                                                                  | Otic/ topical use  | 0.05 | 0.05 | 0    | 0.39 |  | Skin abscess                  |
|                                                    |                                           |          |        | Cut, shade/ sundry, pound into powder, soak/boil with <i>Syzygium cordatum</i> , <i>Flueggea virosa</i> , and <i>Asparagus buehneri</i> in water, drink a half cup a day.                                                                         | Oral               |      |      |      |      |  | Bilharzia                     |

|                                              |                                 |           |        |                                                                                                                                                                                                                                                                                                                      |                    |      |      |      |      |                      |
|----------------------------------------------|---------------------------------|-----------|--------|----------------------------------------------------------------------------------------------------------------------------------------------------------------------------------------------------------------------------------------------------------------------------------------------------------------------|--------------------|------|------|------|------|----------------------|
| <i>Pericopsis angolensis</i> (Baker) Meeuwen | Leguminosae/WC/MST058/M/T/LC    | Muwan ga  | Roots  | Cut, shade/ sundry, pound into powder, mix with <i>Pterocarpus angolensis</i> and <i>Securidaca longipendunculata</i> , mix with cooking oil or vaseline, apply on the affected area.                                                                                                                                | Topical            | 0.08 | 0.08 | 0    | 0.59 | Ringworms            |
|                                              |                                 |           |        | Cut, mix with <i>Ziziphus abyssinica</i> , <i>Boscia angustifolia</i> , <i>Ficus sycamorus</i> , <i>Mucuna stans</i> , and <i>Lannea discolor</i> dried powdered material with water, simmer with lukewarm water, and press on the affected limbs.                                                                   | Oral               |      |      |      |      | Polio                |
|                                              |                                 |           |        | Cut, mix with <i>Dichrostachys cinerea</i> , <i>Mucuna stans</i> , and <i>Asparagus buechananii</i> roots half burn, make incisions on the affected lung area.                                                                                                                                                       | Subcutaneous       |      |      |      |      | Whooping cough       |
| <i>Phaseolus vulgaris</i> L.                 | Leguminosae/WC/MST062/C/HV/NE   | Nyemba    | Leaves | Mix <i>Azadirachta indica</i> , <i>Allium sativum</i> , <i>Zingiber officinale</i> with <i>Mylabis</i> spp (insect), and monkey bones, pulverize into powder, boil for 10-15 min, take it orally one cup full, 2-3 times a day).                                                                                     | Oral               | 0.1  | 0.05 | 0    | 0.39 | HIV/AIDS             |
|                                              |                                 |           |        | Cut, shade/ sundry, pound into powder, mix with <i>Capsicum annum</i> , <i>Asparagus buechananii</i> , <i>Arachis hypogaea</i> , and <i>Pseudolachnostylis maprouneifolia</i> , prepare porridge/ mix the powdered material with an antelope's skin, snail's shell and vegetable oil and apply on the affected area. | Oral, topical      |      |      |      |      | Athlete's foot       |
| <i>Pouzolzia mixta</i> Solms                 | Urticaceae/WC/MST044/W/S/LC     | Lithopwa  | Leaves | Cut fresh leaves into small pieces, boil with water for less than 10 min, mix with honey/milk and drink 2-3 times a day.                                                                                                                                                                                             | Oral               | 0.05 | 0.03 | 1    | 0.2  | Ulcers               |
| <i>Pseudolachnostylis maprouneifolia</i> Pax | Phyllanthaceae/WC/MST002/W/T/LC | Msolo     | Roots  | Cut, mix with <i>Gymnosporia senegalensis</i> , boil for 10-15 min, wash eyes/ cover with a blanket for 6-10 min for 3 times a day.                                                                                                                                                                                  | Ocular             | 0.25 | 0.08 | 0.78 | 0.59 | Conjunctivitis       |
|                                              |                                 |           |        | Cut, shade/ sundry, pound into powder, mix with <i>Capsicum annum</i> , <i>Asparagus buechananii</i> , <i>Arachis hypogaea</i> , and <i>Phaseolus vulgaris</i> , prepare porridge/ mix the powdered material with an antelope's skin, snail's shell and vegetable oil and apply on the affected area.                | Oral, topical      |      |      |      |      | Athlete's foot       |
| <i>Psidium guajava</i> L                     | Myrtaceae/WC/MST072/M/T/LC      | Guafa     | Leaves | Cut, sun/shade dry, grind into powder, mix with <i>Cissus grisea</i> , and <i>Mangifera indica</i> , put 1-2 teaspoons into porridge, 2 times a day.                                                                                                                                                                 | Oral               | 0.05 | 0.05 | 1    | 0.27 | Dysentery, diarrhoea |
| <i>Psorospermum febrifugum</i> Spach.        | Hypericaceae/WC/MST079/W/T/LC   | Kavundula | Roots  | Cut, shade/ sundry, pound into powder, boil with <i>Mangifera indica</i> in water, drink half -one cup a day.                                                                                                                                                                                                        | Oral               | 0.2  | 0.23 | 0.43 | 1.27 | Dysentery, Diarrhoea |
|                                              |                                 |           |        | Cut, shade/sundry, pound into powder, mix with <i>Psorospermum febrifugum</i> , <i>Ziziphus abyssinia</i> , and <i>Trichodesma zeylanicum</i> prepare porridge/ half burn the roots, and make incisions on the affected lung area.                                                                                   | Oral, subcutaneous |      |      |      |      | Pneumonia            |
|                                              |                                 |           |        | Cut, shade/ sundry, grind into powder, mix with <i>Trichodesma zeylanicum</i> , prepare porridge/ wash affected area with <i>Aloe christianii</i> leaf sap and apply powder.                                                                                                                                         | Oral, topical use  |      |      |      |      | Syphilis, Chancroid  |
|                                              |                                 |           |        | Cut, shade/ sundry, pound into powder, soak/boil with <i>Acacia amythethophylla</i> in water, drink half cup 2-3 times a day.                                                                                                                                                                                        | Oral               |      |      |      |      | Cholera              |

|                                                 |                                |                |       |                                                                                                                                                                                                                                            |                             |       |      |      |      |                            |
|-------------------------------------------------|--------------------------------|----------------|-------|--------------------------------------------------------------------------------------------------------------------------------------------------------------------------------------------------------------------------------------------|-----------------------------|-------|------|------|------|----------------------------|
|                                                 |                                |                |       | Clean the roots, burn incompletely/charr, crush into powder, sieve and add body lotion/oil e.g., vaseline, apply on the body.                                                                                                              | Topical                     |       |      |      |      | Scabies                    |
|                                                 |                                |                |       | Cut, shade/ sundry, pound into powder, mix with <i>Tephrosia vogelli</i> , mix with cooking oil or vaseline, apply on the affected area.                                                                                                   | Topical use                 |       |      |      |      | Ringworms                  |
|                                                 |                                |                |       | Cut, shade/ sundry, pound into powder, boil with <i>Psorospermum febrifugum</i> , and <i>Zanthoxylum chalybeum</i> in water, drink a half cup a day.                                                                                       | Oral                        |       |      |      |      | Bilharzia                  |
| <i>Psychotria eminiana</i> (Kuntze) E.M.A.Petit | Rubiaceae/WC/MST004/W/S/LC     | Chisun khunthu | Roots | Cut, shade/ sun dry, pound into powder, mix with <i>Musa × paradisiaca</i> , <i>Acacia amythethophylla</i> , soak in water and wash on affected area/prepare porridge and add half teaspoon 3 times a day.                                 | Genital wash                | 0.125 | 0.1  | 0.50 | 0.59 | Syphilis                   |
|                                                 |                                |                |       | Cut, shade dry, pound into powder, mix with <i>Ziziphus abyssinica</i> , <i>Erthrophleum suaveolens</i> , soak in water, sieve and administer with milk/ honey (1-2 teaspoons), drink half cup.                                            | Oral                        |       |      |      |      | Intestinal worms/Helminths |
|                                                 |                                |                |       | Cut into small pieces, shade dry, grind into powder with mortar and pestle, boil with <i>Terminalia sericea</i> for less than 10 min, mix with honey/milk and drink.                                                                       | Oral                        |       |      |      |      | Ulcers                     |
| <i>Pterocarpus angolensis</i> DC.               | Leguminosae/WC/MST008/M/T/LC   | Mlombwa        | Roots | Mix <i>Pterocarpus angolensis</i> , <i>Trichodesma zeylanicum</i> , and <i>Dichrostachys cinerea</i> , clean the roots, burn incompletely/charr, crush into powder, sieve, and add body lotion/oil e.g., vaseline, apply on the body.      | Oral                        | 0.1   | 0.13 | 0    | 0.86 | Scabies                    |
|                                                 |                                |                |       | Cut, shade/ sundry, pound into powder, boil with <i>Uapaca sansibarica</i> in water, drink half -one cup a day.                                                                                                                            | Topical                     |       |      |      |      | Diarrhoea                  |
|                                                 |                                |                |       | Cut, shade/ sundry, pound into powder, mix with <i>Euphorbia griseola</i> , <i>Albizia antunesiana</i> , and <i>Pterocarpus angolensis</i> , soak in water and wash on affected area/prepare porridge and add half teaspoon 3 times a day. | Oral, topical/ genital wash |       |      |      |      | Gonorrhoea                 |
|                                                 |                                |                |       | Cut, shade/ sundry, pound into powder, mix with <i>Securidaca longipendunculata</i> and <i>Pericopsis angolensis</i> , mix with cooking oil or vaseline, apply to the affected area.                                                       | Topical                     |       |      |      |      | Ringworms                  |
|                                                 |                                |                |       | Cut, shade/ sundry, pound into powder, soak/boil with <i>Solanum panduriforme</i> , and <i>Ozoroa insignis</i> in water, drink a half cup a day.                                                                                           | Oral                        |       |      |      |      | Bilharzia                  |
| <i>Reissantia indica</i> (Willd) N. Halle       | Celastraceae/WC/MST075/W/T/NE  | Mulwivi        | Roots | Mix <i>Erthrophleum suaveolens</i> , <i>Boscia angustifolia</i> , and <i>Securidaca longipedunculata</i> , cut, sundry, pound into powder, prepare porridge and add half to 1 teaspoon.                                                    | Oral                        | 0.05  | 0.05 | 0    | 0.39 | Tuberculosis               |
|                                                 |                                |                |       | Cut, shade/ sundry, pound into powder, mix with <i>Senna singueana</i> , <i>Musa × paradisiaca</i> , <i>Eragrostis patens</i> , soak in water and wash/massage on the affected area.                                                       | Topical                     |       |      |      |      | Chancroid                  |
| <i>Ricinus communis</i> L.                      | Euphorbiaceae/WC/MST050/W/S/NE | Mono           | Roots | Cut, shade/ sundry, pound into powder, mix with <i>Monotes africana</i> , and <i>Senna spectabilis</i> , soak in water, and wash on the affected area.                                                                                     | Genital wash                | 0.2   | 0.08 | 0.71 | 0.59 | Candidiasis                |

|                                              |                                       |                        |                   |                                                                                                                                                                                                                                          |                      |      |      |      |      |              |
|----------------------------------------------|---------------------------------------|------------------------|-------------------|------------------------------------------------------------------------------------------------------------------------------------------------------------------------------------------------------------------------------------------|----------------------|------|------|------|------|--------------|
|                                              |                                       |                        |                   | Mix <i>Securidaca longipedunculata</i> , <i>Ficus natalensis</i> , and <i>Uapaca sansibarica</i> , clean the roots, burn incompletely/charr, crush into powder, sieve and add body lotion/oil e.g., vaseline, apply on the body.         | Topical              |      |      |      |      | Scabies      |
|                                              |                                       |                        |                   | Cut, shade dry, pound into powder, mix with <i>Maprounea Africana</i> , and <i>Carica papaya</i> soak in water, sieve and administer with milk/honey (1-2 teaspoons), drink half cup.                                                    | Oral                 |      |      |      |      | Ulcers       |
| <i>Rumex usambarensis</i> (Dammer)<br>Dammer | Polygonaceae/W<br>C/MST017/W/H/DD     | Mbozy<br>atete         | Leaves<br>. roots | Mix Fresh/dried plant material with <i>Cassia abbreviata</i> , soak in water, sieve, and drink half cup 2-3 times a day.                                                                                                                 | Oral use             | 0.05 | 0.05 | 0    | 0.39 | Meningitis   |
|                                              |                                       |                        |                   | Clean with water, section into small pieces, shade dry, grind into powder with mortar and pestle, mix with <i>Grewia damine</i> , and <i>Ficus sycomorus</i> , cold macerate, and administer orally or mix with porridge, 3 times a day. | Oral                 |      |      |      |      | Malaria      |
|                                              |                                       |                        |                   | Cut, shade/ sundry, pound into powder, soak/boil with <i>Zanha africana</i> and <i>Maprounea africana</i> in water, drink a half cup a day.                                                                                              | Oral                 |      |      |      |      | Bilharzia    |
| <i>Securidaca longipedunculata</i> Fresen    | Polygalaceae/W<br>C/MST007/W/S/L<br>C | Muulu<br>ka            | Stem<br>Bark      | Cut, shade/ sundry, pound into powder, mix with <i>Pterocarpus angolensis</i> and <i>Pericopsis angolensis</i> , mix with cooking oil or vaseline, apply on the affected area.                                                           | Topical              | 0.13 | 0.15 | 0.25 | 0.93 | Ringworms    |
|                                              |                                       |                        |                   | Mix <i>Dichrostachys cinerea</i> , <i>Securidaca longipendunculata</i> , and <i>Asparagus buchananii</i> , crush the plant material, add some water, obtain the filtrate and rub on the lungs area.                                      | Topical              |      |      |      |      | Pneumonia    |
|                                              |                                       |                        |                   | Mix <i>Erthrophleum suaveolens</i> , <i>Boscia angustifolia</i> , <i>Reissantia indica</i> , and <i>Securidaca longipedunculata</i> , cut, sundry, pound into powder, prepare porridge and add half to 1 teaspoon.                       | Oral                 |      |      |      |      | Tuberculosis |
|                                              |                                       |                        |                   | Cut, shade/ sundry, pound into powder, soak/boil with <i>Sesamum angolense</i> , <i>Securidaca longipedunculata</i> , and <i>Droogmansia pteropus</i> in water, drink half cup 2-3 times a day.                                          | Oral                 |      |      |      |      | Cholera      |
|                                              |                                       |                        |                   | Mix <i>Ricinus communis</i> , <i>Ficus natalensis</i> , and <i>Uapaca sansibarica</i> , clean the roots, burn incompletely/charr, crush into powder, sieve and add body lotion/oil e.g., vaseline, apply on the body.                    | Topical              |      |      |      |      | Scabies      |
|                                              |                                       |                        |                   | Cut, shade/ sundry, pound into powder, mix with <i>Senna singueana</i> , <i>Reissantia indica</i> , <i>Musa × paradisiaca</i> , and <i>Eragrostis patens</i> , soak in water and wash/massage on the affected area.                      | Topical              |      |      |      |      | Chancroid    |
| <i>Senna singueana</i> (Delile) Lock         | Leguminosae/W<br>C/MST049/W/T/LC      | Mtanth<br>a<br>nyerere | Roots             | Cut, shade/ sundry, pound into powder, mix with <i>Musa × paradisiaca</i> , and <i>Senna singuena</i> , soak in water and wash on affected area/ prepare porridge and mix half teaspoon 2-3 times a day.                                 | Oral, topical<br>use | 0.13 | 0.1  | 0.5  | 0.66 | Gonorrhea    |
|                                              |                                       |                        |                   | Cut, shade/ sundry, pound into powder, mix with <i>Reissantia indica</i> , <i>Musa × paradisiaca</i> , and <i>Eragrostis patens</i> , soak in water and wash/massage on the affected area.                                               | Topical              |      |      |      |      | Chancroid    |

|                                                     |                              |                   |                |                                                                                                                                                                                                                                      |                             |      |      |      |      |                      |
|-----------------------------------------------------|------------------------------|-------------------|----------------|--------------------------------------------------------------------------------------------------------------------------------------------------------------------------------------------------------------------------------------|-----------------------------|------|------|------|------|----------------------|
|                                                     |                              |                   |                | Cut, shade/ sundry, pound into powder, soak/boil with <i>Carica papaya</i> , and <i>Capsicum annuum</i> in water, drink half -one cup a day.                                                                                         | Oral                        |      |      |      |      | Cholera              |
|                                                     |                              |                   |                | Clean with water, section into small pieces, shade dry, grind into powder with mortar and pestle, mix with <i>Bauhinia thonningii</i> , cold macerate, administer orally or mix with porridge, 3 times a day.                        | Oral                        |      |      |      |      | Malaria              |
| <i>Senna spectabilis</i> (DC.) H.S. Irwin & Barneby | Leguminosae/WC/MST059/W/T/LC | Sindere lla       | Stem Bark      | Cut, shade/ sundry, pound into powder, mix with <i>Steganotaenia araliacea</i> and <i>Cassytha filiformis</i> , soak in water, and wash/massage on affected area/ With a smooth stone, boil in water and massage the affected area.  | Oral, topical               | 0.2  | 0.13 | 0.86 | 0.61 | Chancroid            |
|                                                     |                              |                   |                | Cut, shade/ sundry, pound into powder, mix with <i>Monotes africana</i> , and <i>Ricinus communis</i> , soak in water, and wash on affected area/ prepare porridge to add a half-1 teaspoon of powdered material 2-3 times a day.    | Oral, topical/ genital wash |      |      |      |      | Candidiasis          |
|                                                     |                              |                   |                | Cut, sun/shade dry, grind into powder, mix with <i>Terminalia sericea</i> , and <i>Syzygium cordatum</i> , prepare porridge and add half-1 teaspoon 2-3 times a day.                                                                 | Oral                        |      |      |      |      | Diarrhoea            |
|                                                     |                              |                   |                | Cut, shade/ sundry, pound into powder, mix with <i>Ficus natalensis</i> , <i>Lannea discolor</i> , and <i>Gardenia ternifolia</i> , soak in water and wash on affected area/ prepare porridge and mix half teaspoon 2-3 times a day. | Oral, topical use           |      |      |      |      | Gonorrhoea           |
| <i>Sesamum angolense</i> Welw.,                     | Pedaliaceae/WC/MST057/W/H/D  | Nyolon yolo/maope | Leaves         | Cut, shade/ sundry, pound into powder, soak/boil with <i>Securidaca longipedunculata</i> , and <i>Droogmansia pteropus</i> in water, drink half cup 2-3 times a day.                                                                 | Oral                        | 0.05 | 0.05 | 0    | 0.39 | Cholera              |
|                                                     |                              |                   |                | Cut, mix with <i>Abelmoschus esculentus</i> , <i>Sesamum angolense</i> , <i>Ziziphus abyssinica</i> , and <i>Ozoroa insignis</i> roots half burn, make incisions on the affected lung area.                                          | Subcutaneous                |      |      |      |      | Whooping cough       |
| <i>Solanum panduriforme</i> E. Mey.                 | Solanaceae/WC/MST009/W/H/LC  | Nthula            | Leaves , Roots | Cut, shade/ sundry, pound into powder, mix with <i>Trichodesma zeylanicum</i> prepare porridge/ mix powder with water or oil, and apply on the affected area.                                                                        | Oral, topical use           | 0.2  | 0.13 | 0.71 | 0.73 | Ringworms, Chancroid |
|                                                     |                              |                   |                | Cut, mix with <i>Solanum panduriforme</i> and <i>Baccharoides adoensis</i> roots half burn, make incisions on the affected lung area.                                                                                                | Subcutaneous                |      |      |      |      | Pneumonia            |
|                                                     |                              |                   |                | Cut, shade/ sundry, pound into powder, mix with porridge/ mix powder with vaseline/ cooking oil, and apply powder on the affected area.                                                                                              | Topical                     |      |      |      |      | Shingles             |
|                                                     |                              |                   |                | Cut, shade/ sundry, pound into powder, soak/boil with <i>Ozoroa insignis</i> and <i>Pterocarpus angolensis</i> in water, drink a half cup a day.                                                                                     | Oral                        |      |      |      |      | Bilharzia            |
| <i>Solanum lycopersicum</i> L                       | Solanaceae/WC/MST065/C/H/NE  | Tomato            | Fruit          | Eat a lot of ripe tomatoes/ crush the tomato and wash your eyes.                                                                                                                                                                     | Oral, ocular                | 0.13 | 0.03 | 1    | 0.2  | River blindness      |
| <i>Steganotaenia araliacea</i> Hochst.              | Apiaceae/WC/MST032/W/S/LC    | Nyong oloka       | Leaves , Roots | Cut, sun/shade dry, grind into powder, mix with <i>Ziziphus abyssinica</i> , and <i>Steganotaenia araliacea</i> , prepare porridge and add half-1 teaspoon 2-3 times a day.                                                          | Oral                        | 0.08 | 0.08 | 0.05 | 0.46 | Diarrhoea            |



|                                                   |                                       |              |              |                                                                                                                                                                                                                              |                      |      |      |      |      |  |                                     |
|---------------------------------------------------|---------------------------------------|--------------|--------------|------------------------------------------------------------------------------------------------------------------------------------------------------------------------------------------------------------------------------|----------------------|------|------|------|------|--|-------------------------------------|
|                                                   |                                       |              |              | Cut, shade/ sundry, pound into powder, mix with <i>Senna spectabilis</i> and <i>Cassytha filiformis</i> , soak in water and wash on the affected area/ With a smooth stone, boil in water and massage the affected area.     | Topical              |      |      |      |      |  | Chancroid                           |
|                                                   |                                       |              |              | Cut, shade dry, pound into powder, mix with <i>Cassipourea malosana</i> , and <i>Bauhinia thonningii</i> soak in water, sieve and administer with milk/ honey (1-2 teaspoons), drink half cup.                               | Oral                 |      |      |      |      |  | Intestinal worms/helminths          |
| <i>Syzygium cordatum</i><br>Hochst. ex<br>Krauss  | Myrtaceae/WC/<br>MST055/W/S/LC        | Katope       | Stem<br>Bark | Cut, sun/shade dry, grind into powder, mix with <i>Senna spectabilis</i> , and <i>Terminalia sericea</i> , prepare porridge and add half-1 teaspoon 2-3 times a day.                                                         | Oral                 | 0.05 | 0.05 | 0    | 0.39 |  | Diarrhea                            |
|                                                   |                                       |              |              | Cut, shade/ sundry, pound into powder, soak/boil with <i>Parinari curatellifolia</i> , <i>Flueggea virosa</i> , and <i>Asparagus buchananii</i> in water, drink a half cup a day.                                            | Oral                 |      |      |      |      |  | Bilharzia                           |
| <i>Tephrosia vogelli</i><br>Hook.f                | Leguminosae/W<br>C/MST018/W/S/L<br>C  | Mtetez<br>ya | Roots        | Cut, shade/ sundry, pound into powder, mix with <i>Psorospermum febrifugum</i> , and cooking oil or vaseline, apply to the affected area.                                                                                    | Topical              | 0.13 | 0.05 | 1    | 0.27 |  | Ringworms                           |
|                                                   |                                       |              |              | Sun/shade dry, grind into powder, mix with <i>Annona senegalensis</i> and vaseline or cooking oil, apply on the affected area, 2-3 times a day.                                                                              | Otic/ topical<br>use |      |      |      |      |  | Skin abscess                        |
| <i>Terminalia sericea</i> Burch. ex<br>DC,        | Combretaceae/W<br>C/MST027/W/T/<br>NE | Mjoyi        | Root<br>Bark | Cut, sun/shade dry, grind into powder, mix with <i>Senna spectabilis</i> , and <i>Syzygium cordatum</i> , prepare porridge and add half-1 teaspoon 2-3 times a day.                                                          | Oral                 | 0.13 | 0.08 | 1    | 0.34 |  | Diarrhoea                           |
|                                                   |                                       |              |              | Cut, sun/shade dry, grind into powder, mix with <i>Monotes africana</i> , <i>Eriosema ellipticum</i> , <i>Terminalia sericea</i> , and <i>Cascabela thevetia</i> , prepare porridge and add half-1 teaspoon 2-3 times a day. | Oral                 |      |      |      |      |  | Dysentery                           |
|                                                   |                                       |              |              | Cut into small pieces, shade dry, grind into powder with mortar and pestle, boil with <i>Psychotria eminiana</i> for less than 10 min, mix with honey/milk, and drink.                                                       | Oral                 |      |      |      |      |  | Ulcers                              |
|                                                   |                                       |              |              | Cut, sun/shade dry, grind into powder, mix with <i>Monotes africana</i> , and <i>Terminalia sericea</i> , put 1-2 teaspoons into porridge, 2-3 times a day.                                                                  | Oral                 |      |      |      |      |  | Dysentery                           |
| <i>Trichodesma zeylanicum</i><br>(Burm. f.) R. Br | Boraginaceae/W<br>C/MST020/W/H/<br>LC | Chawa<br>wa  | Leaves       | Cut, shade/ sundry, pound into powder, mix with <i>Hypoxis nyasica</i> and <i>Solanum panduriforme</i> prepare porridge/ wash affected area with <i>Aloe christianii</i> and apply powder.                                   | Oral, topical<br>use | 0.23 | 0.18 | 0.63 | 1    |  | Candidiasis,<br>Syphilis, Ringworms |
|                                                   |                                       |              |              | Cut, shade/sundry, pound into powder, mix with <i>Psorospermum febrifugum</i> , and <i>Ziziphus abyssinia</i> prepare porridge/ half burn the roots and make incisions on the affected lung area.                            | Topical use          |      |      |      |      |  | Pneumonia                           |
|                                                   |                                       |              |              | Cut, shade/sundry, pound into powder, soak in water and wash eyes.                                                                                                                                                           | Ocular               |      |      |      |      |  | River blindness                     |
|                                                   |                                       |              |              | Cut, shade/sundry, pound into powder, mix with <i>Azanza garckeana</i> , soak in water and wash eyes,                                                                                                                        | Ocular               |      |      |      |      |  | Conjunctivitis                      |

|                                         |                                         |               |                 |                                                                                                                                                                                                                                       |                          |      |      |      |      |                                   |
|-----------------------------------------|-----------------------------------------|---------------|-----------------|---------------------------------------------------------------------------------------------------------------------------------------------------------------------------------------------------------------------------------------|--------------------------|------|------|------|------|-----------------------------------|
|                                         |                                         |               |                 | Mix <i>Pterocarpus angolensis</i> , and <i>Dichrostachys cinerea</i> , clean the roots, burn incompletely/charr, crush into powder, sieve and add body lotion/oil e.g., vaseline, apply on the body.                                  | Topical use              |      |      |      |      | Scabies                           |
| <i>Uapaca kirkiana</i><br>Mull.Arg      | Phyllanthaceae/<br>WC/MST070/M/<br>T/LC | Masuk<br>u    | Roots           | Cut, shade/ sundry, pound into powder, boil with <i>Luffa cylindrica</i> , and <i>Cascabela thevetia</i> in water, drink half -one cup a day.                                                                                         | Oral                     | 0.1  | 0.08 | 0.33 | 0.59 | Diarrhoea                         |
|                                         |                                         |               |                 | Cut, shade/ sundry, pound into powder, mix with <i>Leptactina benguelensis</i> , and <i>Carica papaya</i> , soak in water and wash on the affected area.                                                                              | Topical/ genital<br>wash |      |      |      |      | Candidiasis                       |
|                                         |                                         |               |                 | Cut, shade/ sundry, pound into powder, soak/boil with <i>Eragrostis patens</i> , <i>Gardenia ternifolia</i> , and <i>Morus alba</i> in water, drink a half cup a day.                                                                 | Oral                     |      |      |      |      | Bilharzia                         |
| <i>Uapaca<br/>sansibarica</i><br>Pax.Tr | Phyllanthaceae/<br>WC/MST046/W/<br>T/LC | Msokol<br>owe | Roots/<br>stems | Cut, shade/ sundry, pound into powder, boil with <i>Pterocarpus angolensis</i> in water, drink half -one cup a day.                                                                                                                   | Oral, topical<br>use     | 0.05 | 0.05 | 0    | 0.39 | Diarrhoea                         |
|                                         |                                         |               |                 | Mix <i>Ricinus communis</i> , <i>Securidaca longipedunculata</i> , and <i>Ficus natalensis</i> , clean the roots, burn incompletely/charr, crush into powder, sieve and add body lotion/oil e.g., vaseline, apply on the body.        | Topical                  |      |      |      |      | Scabies                           |
| <i>Zanha africana</i><br>(Radlk) Exell  | Sapindaceae/WC<br>/MST030/W/T/D<br>D    | Muzak<br>aka  | Roots/<br>Stems | Cut, shade/ sundry, pound into powder, mix with <i>Psorospermum febrifugum</i> and <i>Zanthoxylum chalybeum</i> , prepare porridge/ wash affected area.                                                                               | Oral                     | 0.23 | 0.15 | 0.5  | 1.05 | Chancroid                         |
|                                         |                                         |               |                 | Cut, shade dry, pound into powder, mix with <i>Erthrophleum suaveolens</i> , prepare porridge/ half burn the root, and make incisions on the affected area.                                                                           | Oral                     |      |      |      |      | Polio                             |
|                                         |                                         |               |                 | Cut, shade dry, pound into powder, soak in water, drink half cup/ mix powder with <i>Bacchorides adoensis</i> and vaseline and apply on the affected part,                                                                            | Oral, topical<br>use     |      |      |      |      | Ringworms                         |
|                                         |                                         |               |                 | Cut, mix, with fresh Eucalyptus camadulensis leaves, boil, and steam,                                                                                                                                                                 | Steaming                 |      |      |      |      | Covid-19                          |
|                                         |                                         |               |                 | Cut, shade/ sundry, pound into powder, soak/boil with <i>Pseudolachnostylis maprouneifolia</i> and <i>Maprounea africana</i> in water, drink a half cup a day.                                                                        | Oral                     |      |      |      |      | Bilharzia                         |
|                                         |                                         |               |                 | Cut, shade dry, pound into powder, soak in water, drink half cup/ mix powder with <i>Baccharoides adoensis</i> , <i>Cassia abbreviata</i> , <i>Oldfieldia dactylophylla</i> , and vaseline, apply on the affected part 2 times a day. | Topical use              |      |      |      |      | Shingles                          |
| <i>Zanthoxylum<br/>chalybeum</i> Engl.  | Rutaceae/WC/M<br>ST015/M/T/LC           | Zobala        | Roots           | Cut, shade/ sundry, pound into powder, mix with <i>Psorospermum febrifugum</i> and <i>Zanha africana</i> , prepare porridge/ wash affected area.                                                                                      | Oral, topical<br>use     | 0.80 | 0.28 | 0.81 | 1.66 | Chancroid,<br>Gonorrhea, Syphilis |
|                                         |                                         |               |                 | Cut, sundry, pound into powder, mix with <i>Ziziphus abbyssinia</i> and <i>Ozoroa insignis</i> prepare porridge 2-3 times a day.                                                                                                      | Oral,<br>subcutaneous    |      |      |      |      | Common cold,<br>Tuberculosis      |

|                                     |                                        |                  |                   |                                                                                                                                                                                                                                    |                       |      |      |      |      |  |                          |
|-------------------------------------|----------------------------------------|------------------|-------------------|------------------------------------------------------------------------------------------------------------------------------------------------------------------------------------------------------------------------------------|-----------------------|------|------|------|------|--|--------------------------|
|                                     |                                        |                  |                   | Cut, shade dry, pound into powder, soak/boil with <i>Acacia amythethophylla</i> in water, drink half -one cup a day with milk/ 1-2 teaspoon of honey.                                                                              | Oral                  |      |      |      |      |  | Ulcers                   |
|                                     |                                        |                  |                   | Cut, shade dry, pound into powder, soak/boil with <i>Cassia abbreviata</i> and <i>Oldfieldia dactylophylla</i> in water, drink half -one cup a day with milk/ 1-2 teaspoon of honey.                                               | Oral                  |      |      |      |      |  | Malaria                  |
|                                     |                                        |                  |                   | Cut, shade/ sundry, pound into powder, mix with <i>Hypoxis nyasica</i> , prepare porridge/ wash affected area with <i>Aloe christianii</i> and apply powder.                                                                       | Oral, topical use     |      |      |      |      |  | Athlete's foot           |
|                                     |                                        |                  |                   | Cut, shade/ sundry, pound into powder, boil with <i>Oldfieldia dactylophylla</i> , and <i>Psorospermum febrifugum</i> in water, drink a half cup a day.                                                                            | Oral                  |      |      |      |      |  | Bilharzia                |
|                                     |                                        |                  |                   | Cut, shade/sundry, pound into powder, soak in water and wash eyes.                                                                                                                                                                 | Ocular                |      |      |      |      |  | Conjunctivitis           |
|                                     |                                        |                  |                   | Cut, shade/ sundry, pound into powder, mix with <i>Ozoroa insignis</i> , prepare and add in porridge, 1 teaspoon 2 times a day.                                                                                                    | Oral                  |      |      |      |      |  | Cholera                  |
|                                     |                                        |                  |                   | Cut, mix, with fresh <i>Eucalyptus camadulensis</i> leaves, boil, and steam.                                                                                                                                                       | Inhalation            |      |      |      |      |  | Common cold              |
| <i>Zea mays</i> L.                  | Poaceae/WC/MS<br>T011/C/G/NE           | Ngoma<br>viswesi | Seeds,<br>tassels | Remove seeds from dried cob, crush into coarse particles with mortar and pestle, soak 1-2 days, sieve, and drink the filtrate.                                                                                                     | Oral                  | 0.55 | 0.08 | 0.95 | 0.46 |  | Bilharzia, Cholera       |
|                                     |                                        |                  |                   | Clean, mix <i>Grewia damine</i> roots, the half burn of a fire source, crush into powder, make minor incisions on the affected area.                                                                                               | Subcutaneous          |      |      |      |      |  | Whooping cough           |
| <i>Zingiber officinale</i> Roscoe   | Zingiberaceae/W<br>C/MST074/C/H/<br>LC | Jinja            | Rhizo<br>me       | Cut mix <i>Azadirachta indica</i> , <i>Allium sativum</i> , and <i>Ziziphus abyssinica</i> boil for 10-15 min, then steaming by covering oneself with a blanket for 5-10 min, 2-3 times a day.                                     | Oral                  | 0.65 | 0.1  | 0.96 | 0.54 |  | Common cold,<br>Covid 19 |
|                                     |                                        |                  |                   | Cut, sun/shade dry, grind into powder, mix with <i>Allium sativum</i> , put 1-2 teaspoons into porridge, 2 times a day.                                                                                                            | Oral                  |      |      |      |      |  | Diarrhoea                |
|                                     |                                        |                  |                   | Mix <i>Azadirachta indica</i> , <i>Allium sativum</i> , <i>Phaseolus vulgaris</i> with <i>Mylabis sp</i> (insect), and monkey bones, pulverize into powder, boil for 10-15 min, and take it orally one cup full, 2-3 times a day). | Oral                  |      |      |      |      |  | HIV/AIDS                 |
| <i>Ziziphus abyssinica</i> A. Rich. | Rhamnaceae/WC<br>/MST022/M/T/L<br>C    | Kankha<br>nde    | Leaves            | Cut, mix with <i>Abelmoschus esculentus</i> , <i>Sesamum angolense</i> , <i>Ziziphus abyssinica</i> , and <i>Ozoroa insignis</i> roots half burn, make incisions on the affected lung area.                                        | Oral                  | 0.38 | 0.23 | 0.88 | 1.02 |  | Whooping cough           |
|                                     |                                        |                  |                   | Mix <i>Azanza garckeana</i> , and <i>Combretum zeyheri</i> , cut, sundry, pound into powder, prepare porridge, and add half to 1 teaspoon.                                                                                         | Oral                  |      |      |      |      |  | Tuberculosis             |
|                                     |                                        |                  |                   | Cut, shade/sundry, pound into powder, mix with <i>Psorospermum febrifugum</i> and <i>Trichodesma zeylanicum</i> , prepare porridge/ half burn the roots, and make incisions on the affected lung area.                             | Oral,<br>subcutaneous |      |      |      |      |  | Pneumonia                |
|                                     |                                        |                  |                   | Cut, mix <i>Zingiber officinale</i> , <i>Allium sativum</i> , and <i>Ziziphus abyssinica</i> , boil for 10-15 min, then steam by covering oneself with a blanket for 5-10 min, 2-3 times a day.                                    | Inhalation, oral      |      |      |      |      |  | Covid 19                 |

|  |                                                                                                                                                                                                      |      |                            |
|--|------------------------------------------------------------------------------------------------------------------------------------------------------------------------------------------------------|------|----------------------------|
|  | Cut into small pieces, shade dry, grind into powder with mortar and pestle, boil with <i>Dichrostachys cinerea</i> for less than 10 min, mix with honey/milk, and drink.                             | Oral | Ulcers                     |
|  | Cut, sun/shade dry, grind into powder, mix with <i>Steganotaenia araliacea</i> , prepare porridge and add half-1 teaspoon 2-3 times a day.                                                           | Oral | Diarrhoea                  |
|  | Cut, sun/shade dry, grind into powder, prepare porridge and add half-1 teaspoon 2-3 times a day.                                                                                                     | Oral | Dysentery                  |
|  | Cut, shade dry, pound into powder, mix with <i>Erthrophleum suaveolens</i> , and <i>Psychotria eminiana</i> , soak in water, sieve, and administer with milk/ honey (1-2 teaspoons), drink half cup. | Oral | Intestinal worms/helminths |

Habitat; (W) wild; (C) cultivated; (M) mixture of wild and cultivated; Habit; (H) herbs; (T) trees; (SC) succulent cactus; (S) shrubs; (WV) woody vines; (CS) climbing shrubs; (V/HV) vines/herbal vines; IUCN Red list; (NT) near threatened; (LC) least concern; (VU) vulnerable; (DD) data deficient; (EN) endangered; (NE) not evaluated; (CR) critically endangered; (EW) extinct in wild; (EX) extinct.
